# Supplementary material for: Esketamine suppresses astrocyte-driven neuroinflammation in traumatic brain injury via the METTL5/c-Myc/PD-L1
Source: Research Square preprint supplement (doi:10.21203/rs.3.rs-7330976/v1), 2025-08-27
Supplement: Supplementary file 1 [file 6ad371938d26b17a928e25a8.docx]

**Supplemental Table 1. Reagents used in this study**

| Name | Manufacturer | Catalog number | Application |
| --- | --- | --- | --- |
| Rabbit polyclonal antibody to GFAP | Affinity | DF6040 | WB、IF |
| Anti-c-Myc antibody | Abcam | AB32072 | WB、IF、IP |
| Rabbit polyclonal antibody to Methyltransferase like 5 | Affinity | DF13232 | WB、IF、IP |
| Anti-PD-L1 antibody | Abcam | AB213480 | WB、IF、IP |
| Rabbit polyclonal antibody to C3 | Affinity | DF13224 | IF |
| Rabbit Anti-S100A10  antibody | Bioss | bs-8503R | IF |
| IgG | Servicebio | GB23303 | IP |
| Recombinant Anti-GAPDH antibody (HRP Conjugated) | Servicebio | ZB15004-HRP | WB |
| Goat Anti-Rabbit IgG-Fc Secondary Antibody (HRP) | ZSGB-BIO | ZB-2301 | WB |
| FITC-conjugated Goat anti-Rabbit IgG (H+L) | ABclonal | AS011 | IF |
| ABflo® 594-conjugated Goat anti-Rabbit IgG (H+L) | ABclonal | AS039 | IF |
| anti-fade reagent (DAPI) | Beyotime | P0131 | IF |
| Nissl staining | Powerful biology | B0013 | Nissl staining |
| Prestained Protein Ladder(10-180Kda) | Adamas life | E8010 | WB |
| Easy PAGE Gel Fast preparation Kit | Seven | SW145-02 | WB |
| SDS-PAGE Protein Sample Loading Buffer | Beyotime | P0286 | WB |
| PMSF | Beyotime | ST506 | WB |
| RIPA Lysis Buffer | Beyotime | P0013B | WB |
| BCA Protein Assay Kit | Beyotime | P0012 | WB |
| Lipofectamine 2000 reagent | invitrogen | 11668-019 | Plasmid ransfection |
| LPS | Merck | L4391 | cell culture |
| Esketamine hydrochloride injection | Hengrui | H20193336 | cell culture Animal experiments |
| IL-1β | JINGMEI | JM-02323M1 | Elisa |
| 1L-10 | JINGMEI | JM-02459M1 | Elisa |
| TNF-α | JINGMEI | JM-02415M1 | Elisa |
| Cell Counting Kit-8 | Adamas life | C8022 | CCK8 |

**Supplemental Table2.modified Neurological Severity Scoring System**

| Behavioral test | score |
| --- | --- |
| Motor tests | |
| Muscle Status - Hemiplegia | |
| Raising the mouse by the tail: | |
| Forelimb flexion | 1 |
| Hindlimb flexion | 1 |
| Head moving more than 10° from vertical axis within 30 seconds | 1 |
| Placing the mouse on the floor： | |
| Unable to walk straight | 1 |
| Circling toward the paretic side | 1 |
| Falling down the paretic side | 1 |
| Abnormal movements | |
| Immobility and staring | 1 |
| Tremors(wet-dog-shakes) | 1 |
| Myodystony, irritability, seizures, myoclonus | 1 |
| Sensory test | |
| Visual and tactile Placement (Limb Placement Test to detect visual and superficial sensory) | |
| Moving the mouse laterally toward the table | |
| Reaching the table slowly with limbs or can not place at all | 1 |
| Proprioceptive test (deep Sensory): | |
| Pushing the paw against the table to stimulate limb muscles | |
| Losing of resistance | 1 |
| Reflex(blunt or sharp stimulation) absence of | |
| Pinna reflex (a head shake when touching the auditory meatus) | 1 |
| Corneal reflex (an eye blink when lightly touching the cornea with cotton) | 1 |
| Startle reflex (a motor response to a brief loud noise from snapping a clipboard paper) | 1 |

A score of 10 to 14 indicates severe injury; 5 to 9 indicates moderate injury; and 1 to 4 indicates mild injury. The maximum possible score is 14.

**Supplementary Table S3. Primer sequences and siRNAs used in this study**

| Primer name | Sequence (5’-3’) |
| --- | --- |
| GAPDH-F | CCTCGTCCCGTAGACAAAATG |
| GAPDH-R | TGAGGTCAATGAAGGGGTCGT |
| METTL5-F | CGATGACATTGAAAACAAAGCG |
| METTL5-R | TGTCAAATCCAACACACAACCC |
| c-Myc-F | GTCTTTCCCTACCCGCTCAA |
| c-Myc-R | TTGCCTCTTCTCCACAGACACC |
| PD-L1-F | ATTGTAGTGTCCACGGTCCTCC |
| PD-L1-R | CAACGCCACATTTCTCCACATC |
| METTL5-1 siRNA | GAUGUGUACUCAUUAUCUA |
| METTL5-2 siRNA | CAAAGCGGUUGCAGAUCUA |
| METTL5-3 siRNA | GCUUCGAUAUGAUCUACCA |
| GAPDH siRNA | AGAAUGGGAAGCUUGUCAUCAATT |
| NC siRNA | UUCUCCGAACGUGUCACGUTT |
